# Supplementary material
Source: Springer Nature journal article supplement (http://www.springermedizin.de/resource/supplementary/13023_2012_540_MOESM1_ESM.pdf/9642698)
Supplement: MOESM1 [file 9642698]

| Patient         | Age | Sex | Age onset | Hyper CK-emia at age | CK level (U/l) at study onset | First symptoms                                                             | Pheno-type | Nucleotide change                                                                                 | Protein predicted | Western Blotting | Immu-no-histochemi-stry |
|-----------------|-----|-----|-----------|----------------------|-------------------------------|----------------------------------------------------------------------------|------------|---------------------------------------------------------------------------------------------------|-------------------|------------------|-------------------------|
| 1*              | 26  | f   | 19        | 19                   | 4948                          | Climbing stairs impaired                                                   | LGM D      | Exon 9: c.863dupA (p.Asp288GlufsX40), Exon 30: c.3191_3196dup (p.Ala1064_Glu1065dup) <sup>§</sup> | present           | no specific band | negative                |
| 2*              | 30  | f   | 23        | 18                   | 6395                          | Climbing stairs impaired                                                   | LGM D      | Exon 9: c.863dupA (p.Asp288GlufsX40), Exon 30: c.3191_3196dup (p.Ala1064_Glu1065dup) <sup>§</sup> | present           | not done         | not done                |
| 3               | 38  | f   | 24        | 13                   | 5865                          | Calf atrophy, tiptoe walking impaired                                      | MM         | Exon 4: c.265C>T (p.Arg89X), Exon 44: c.4872_4876delinsCCCC (p.Glu1624AspfsX10)                   | absent            | no specific band | negative                |
| 4               | 33  | m   | 27        | 27                   | 4128                          | Fatigue, running impaired                                                  | LGM D      | Exon 26: 2779delG (p.Ala927LeufsX21) homozygous                                                   | absent            | no specific band | negative                |
| 5               | 34  | m   | 33        | 14                   | 4685                          | Climbing stairs impaired                                                   | LGM D      | Exon 24: c.2367C>A (p.Ser789Arg), Exon 53: c.5979dupA (p.Glu1994ArgfsX3)                          | present           | no specific band | negative                |
| 6 <sup>†</sup>  | 26  | m   | 17        | 20                   | 6345                          | Fatigue, climbing stairs                                                   | LGM D      | Exon 21: c.1976dupT (p.Val660GlyfsX12) homozygous                                                 | absent            | not done         | negative                |
| 7               | 44  | f   | 35        | 35                   | 1932                          | Calf atrophy, tiptoe walking impaired                                      | MM         | Exon 29: c.3118C>T (p.Arg1040Trp), Exon 53: c.5979dupA (p.Glu1994ArgfsX3)                         | present           | severely reduced | negative                |
| 8 <sup>‡</sup>  | 27  | f   | 18        | 14                   | 2903                          | Getting up from squatting and tiptoe walking impaired                      | LGM D      | Exon 43: c.4756C>T (p.Arg1586X), Exon 45: c.5022delT (p.Phe1674LeufsX48)                          | absent            | no specific band | negative                |
| 9 <sup>‡</sup>  | 20  | m   | 18        | 6                    | 7237                          | Getting up from squatting and tiptoe walking impaired                      | LGM D      | Exon 43: c.4756C>T (p.Arg1586X), Exon 45: c.5022delT (p.Phe1674LeufsX48)                          | absent            | not done         | not done                |
| 10 <sup>‡</sup> | 30  | f   | 16        | 21                   | 2487                          | Climbing stairs impaired                                                   | LGM D      | Exon 43: c.4756C>T (p.Arg1586X), Exon 45: c.5022delT (p.Phe1674LeufsX48)                          | absent            | not done         | not done                |
| 11              | 35  | m   | 30        | 18                   | 12620                         | Calf atrophy, tiptoe walking impaired                                      | MM         | Exon 5: c.401C>T (p.Pro134Leu), Exon 45: c.5022delT (p.Phe1674LeufsX48)                           | present           | mildly reduced   | reduced                 |
| 12              | 24  | f   | 13        | 13                   | 9099                          | Calf hypertrophy and pronounced tiptoe walking, walking on heels impaired  | DMA T      | Exon 4: c.3113dupC (p.Leu105ProfsX43), Intron 49: c.5525+3 A>G (splice)                           | unknown           | no specific band | negative                |
| 13              | 27  | m   | 18        | 21                   | 7785                          | Climbing stairs impaired                                                   | DMA T      | Exon 4: c.3113dupC (p.Leu105ProfsX43), Intron 49: c.5525+3 A>G (splice)                           | unknown           | not done         | not done                |
| 14*             | 36  | f   | 22        | 22                   | 4996                          | Tiptoe walking and climbing stairs impaired                                | MM         | Exon 6: c.610C>T (p.Arg204X), Exon 22: c.2113G>A (p.Val705Met), Intron 49: c.5525+1G>A (splice)   | present           | not done         | not done                |
| 15*             | 32  | m   | 20        | 21                   | 6480                          | Tiptoe walking impaired                                                    | MM         | Exon 6: c.610C>T (p.Arg204X), Exon 22: c.2113G>A (p.Val705Met), Intron 49: c.5525+1G>A (splice)   | present           | no specific band | negative                |
| 16              | 25  | f   | 22        | 15                   | 7536                          | Tiptoe walking and climbing stairs impaired                                | LGM D      | Exon 34: c.3832C>T (p.Glu1278X), deletion of exon 31 heterozygous                                 | unknown           | no specific band | negative                |
| 17              | 60  | f   | 25        | 20                   | 1989                          | Climbing stairs impaired                                                   | LGM D      | Exon 6: c.610C>T (p.Arg204X), Exon 12: c.1120G>C (p.Val374Leu)                                    | present           | no specific band | severely reduced        |
| 18              | 26  | m   | 18        | 22                   | 7995                          | Calf atrophy, climbing stairs impaired                                     | LGM D      | deletion of exons 37-40 homozygous                                                                | absent            | no specific band | negative                |
| 19 <sup>†</sup> | 19  | f   | 17        | 17                   | 7539                          | Myalgia, tiptoe walking and climbing stairs impaired                       | LGM D      | Exon 21: c.1976dupT (p.Val660GlyfsX12) homozygous                                                 | absent            | not done         | not done                |
| 20 <sup>†</sup> | 19  | f   | 17        | 17                   | 5442                          | Tiptoe walking and climbing stairs impaired                                | LGM D      | Exon 21: c.1976dupT (p.Val660GlyfsX12) homozygous                                                 | absent            | not done         | not done                |
| 21              | 39  | m   | 17        | 17                   | 3324                          | Calf atrophy, tiptoe walking and climbing stairs impaired                  | LGM D      | Exon 7: c.763delC (p.His255ThrfsX33), Exon 29: c.3059dupC (p.Glu1021GlyfsX11)                     | absent            | no specific band | negative                |
| 22              | 36  | m   | 20        | 20                   | 2825                          | Climbing stairs impaired                                                   | LGM D      | Exon 4: c.331C>T (p.Gln111X) homozygous                                                           | absent            | no specific band | negative                |
| 23              | 42  | m   | 32        | 32                   | 3861                          | Calf atrophy, climbing stairs impaired                                     | LGM D      | Intron 28: c.3031+2T>C (splice), Exon 34: c.3832C>T (p.Gln1278X)                                  | present           | not done         | negative                |
| 24 <sup>‡</sup> | 31  | m   | 22        | 22                   | 3941                          | Proximal leg and calf atrophy, climbing stairs and tiptoe walking impaired | LGM D      | Exon 30: c.3321delA (p.Ala1108LeufsX12) homozygous                                                | absent            | no specific band | unknown                 |
| 25 <sup>‡</sup> | 27  | m   | 22        | 22                   | 5114                          | Proximal leg atrophy, climbing stairs impaired                             | LGM D      | Exon 30: c.3321delA (p.Ala1108LeufsX12) homozygous                                                | absent            | not done         | not done                |

f = female, m = male, red = protein present, black = protein absent, blue = unknown.

\*, †, ‡, § = sibs from five different families, § = polymorphism
